# Supplementary material for: Winter Exercise Reduces Allergic Airway Inflammation: A Randomized Controlled Study
Source: PubMed Central journal article supplement (PMC6603979; doi:10.3390/ijerph16112040), 2019-06-08
Supplement: ijerph-16-02040-s001.pdf [file ijerph-16-02040-s001.pdf]

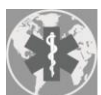

# 1 Supplemental Materials

2

**Table A.** Descriptive statistics of the exercise group.

|                                         | Day 0                   |                | Day 10                  |                | Day 60                  |                |
|-----------------------------------------|-------------------------|----------------|-------------------------|----------------|-------------------------|----------------|
|                                         | Exercise Group (n = 18) |                | Exercise Group (n = 18) |                | Exercise Group (n = 18) |                |
|                                         | mean ± SD               | median ± IQR   | mean ± SD               | median ± IQR   | mean ± SD               | median ± IQR   |
| Pulse (bpm)                             | 70.99 ± 12.57           | 70.38 ± 23.00  | 69.61 ± 6.98            | 69.00 ± 10.25  | 66.89 ± 9.39            | 67.50 ± 9.00   |
| BP-Systole (mmHg)                       | 125.28 ± 14.46          | 123.5 ± 14.50  | 126.44 ± 13.60          | 124.0 ± 22.25  | 125.72 ± 12.08          | 129.5 ± 18.25  |
| BP-Diastole (mmHg)                      | 76.44 ± 9.97            | 78.0 ± 15.00   | 77.83 ± 8.41            | 76.0 ± 14.50   | 79.33 ± 7.75            | 79.5 ± 8.50    |
| Oral FeNO (ppb)                         | 40.78 ± 23.03           | 38.0 ± 39.00   | 22.89 ± 12.42           | 21.0 ± 19.00   | 30.56 ± 24.16           | 23.0 ± 44.00   |
| Nasal FeNO (ppb)                        | 465.33 ± 178.07         | 451.0 ± 146.0  | 363.56 ± 195.63         | 354.0 ± 346.0  | 390.67 ± 248.82         | 367.0 ± 319.0  |
| Nasal Eosinophil Count (%)              | 6.72 ± 13.43            | 1.95 ± 5.40    | 2.63 ± 3.33             | 1.31 ± 2.18    | 7.59 ± 15.02            | 1.65 ± 6.53    |
| Mucociliary Clearance Time (min)        | 11.13 ± 5.44            | 15.00 ± 7.56   | 8.59 ± 5.54             | 7.21 ± 10.67   | 11.51 ± 5.39            | 15.00 ± 7.88   |
| <b>Spirometry</b>                       |                         |                |                         |                |                         |                |
| FVC (%)                                 | 108.17 ± 17.66          | 108.0 ± 12.75  | 108.33 ± 15.88          | 108.0 ± 10.75  | 111.50 ± 13.46          | 110.0 ± 10.25  |
| FEV1 (%)                                | 96.28 ± 20.98           | 98.5 ± 21.25   | 98.44 ± 18.92           | 97.5 ± 24.00   | 98.28 ± 16.58           | 97.0 ± 28.75   |
| FEV1/FVC (%)                            | 93.39 ± 11.81           | 95.0 ± 17.00   | 94.83 ± 10.79           | 98.0 ± 17.00   | 92.39 ± 10.75           | 94.0 ± 18.25   |
| PEF (%)                                 | 99.50 ± 26.37           | 102.5 ± 35.00  | 99.33 ± 22.09           | 100.0 ± 25.00  | 103.17 ± 20.69          | 99.0 ± 26.75   |
| MEF 25%–75%                             | 73.33 ± 31.74           | 71.5 ± 33.50   | 78.61 ± 30.67           | 75.5 ± 35.75   | 73.28 ± 29.91           | 71.0 ± 32.75   |
| <b>Differential Blood Count</b>         |                         |                |                         |                |                         |                |
| WBC (10 <sup>3</sup> /μl)               | 7.41 ± 1.81             | 7.20 ± 2.25    | 6.42 ± 1.30             | 6.16 ± 1.48    | 7.01 ± 1.12             | 6.92 ± 1.22    |
| RBC (106/μl)                            | 4.82 ± 0.37             | 4.79 ± 0.41    | 4.79 ± 0.39             | 4.79 ± 0.34    | 4.79 ± 0.36             | 4.68 ± 0.44    |
| Blood Neutrophil Count (%)              | 59.81 ± 8.52            | 59.96 ± 12.95  | 57.64 ± 8.81            | 58.75 ± 13.35  | 57.37 ± 9.04            | 59.10 ± 12.98  |
| Blood Eosinophil Count (%)              | 3.85 ± 2.95             | 3.35 ± 1.92    | 4.28 ± 4.85             | 2.90 ± 3.35    | 4.18 ± 3.90             | 2.95 ± 2.50    |
| <b>Six-Minute Walk Test</b>             |                         |                |                         |                |                         |                |
| 6MWT-Distance (%)                       | 104.35 ± 8.17           | 105.99 ± 10.97 | 106.13 ± 6.59           | 105.75 ± 11.25 | 105.69 ± 7.72           | 106.80 ± 11.78 |
| Peak Respiratory Frequency (1/min)      | 36.66 ± 10.00           | 36.35 ± 11.40  | 33.16 ± 8.58            | 35.10 ± 6.67   | 30.71 ± 12.73           | 35.90 ± 10.50  |
| Peak Minute Ventilation (L/min)         | 52.67 ± 14.27           | 50.55 ± 17.52  | 55.46 ± 12.52           | 54.30 ± 19.97  | 53.46 ± 11.11           | 53.55 ± 19.05  |
| BORG Scale Dyspnea Post-Test            | 2.11 ± 1.22             | 2.0 ± 2.00     | 1.72 ± 1.10             | 2.0 ± 2.38     | 1.50 ± 1.22             | 1.5 ± 1.50     |
| BORG Scale Fatigue Post-Test            | 2.22 ± 1.10             | 3.0 ± 2.00     | 1.97 ± 1.05             | 2.0 ± 2.00     | 1.78 ± 1.34             | 2.0 ± 1.00     |
| <b>RhinAsthma Questionnaire</b>         |                         |                |                         |                |                         |                |
| Total Score                             | 19.09 ± 12.20           | 15.87 ± 20.18  | 14.80 ± 10.97           | 11.27 ± 13.06  | 14.20 ± 12.70           | 7.75 ± 10.66   |
| Limitation in Daily Life                | 15.80 ± 12.48           | 11.11 ± 23.89  | 12.72 ± 11.68           | 10.00 ± 18.89  | 11.98 ± 12.10           | 8.89 ± 22.78   |
| Respiratory Problems                    | 20.37 ± 14.24           | 16.67 ± 14.39  | 16.16 ± 14.55           | 10.61 ± 18.18  | 15.66 ± 13.60           | 12.12 ± 14.39  |
| Rhinoconjunctivitis Score               | 21.69 ± 15.77           | 21.43 ± 26.19  | 11.90 ± 11.11           | 9.52 ± 13.10   | 15.61 ± 16.15           | 9.52 ± 16.67   |
| Treatment and Medication Problems       | 14.44 ± 14.86           | 10.00 ± 18.33  | 11.48 ± 16.93           | 6.67 ± 13.33   | 9.26 ± 16.19            | 0.00 ± 13.33   |
| Impairment in Sensory Perceptions       | 23.15 ± 17.52           | 20.83 ± 22.92  | 21.76 ± 16.94           | 25.00 ± 22.92  | 18.52 ± 17.28           | 16.67 ± 16.67  |
| <b>Questionnaires</b>                   |                         |                |                         |                |                         |                |
| Asthma Control Test                     | 21.39 ± 3.57            | 22.5 ± 4.50    | 2.61 ± 2.20             | 23.0 ± 3.75    | 22.61 ± 4.09            | 24.0 ± 2.75    |
| Visual Analogue Scale–General Health    | 71.66 ± 14.10           | 85.50 ± 19.00  | 81.78 ± 14.99           | 85.50 ± 6.25   | 81.06 ± 13.80           | 71.22 ± 13.75  |
| Visual Analogue Scale–Allergic Symptoms | 71.31 ± 22.17           | 74.5 ± 12.19   | 85.17 ± 20.07           | 94.5 ± 11.00   | 83.28 ± 13.24           | 86.5 ± 11.50   |

3

4

**Table B.** Descriptive statistics of the control group.

|                                         | Day 0                  |                | Day 10                 |                | Day 60                 |                |
|-----------------------------------------|------------------------|----------------|------------------------|----------------|------------------------|----------------|
|                                         | Control Group (n = 22) |                | Control Group (n = 22) |                | Control Group (n = 22) |                |
|                                         | mean ± SD              | median ± IQR   | mean ± SD              | median ± IQR   | mean ± SD              | median ± IQR   |
| Pulse (bpm)                             | 68.73 ± 8.81           | 67.00 ± 10.75  | 69.18 ± 7.92           | 69.50 ± 9.00   | 68.73 ± 8.58           | 69.50 ± 8.75   |
| BP-Systole (mmHg)                       | 118.45 ± 12.35         | 117.0 ± 20.00  | 116.32 ± 9.74          | 116.0 ± 14.00  | 115.45 ± 8.85          | 116.0 ± 12.50  |
| BP-Diastole (mmHg)                      | 72.95 ± 10.19          | 70.0 ± 17.75   | 70.73 ± 7.72           | 69.5 ± 9.50    | 70.77 ± 8.53           | 69.0 ± 8.75    |
| Oral FeNO (ppb)                         | 38.91 ± 22.30          | 36.0 ± 22.50   | 38.45 ± 26.55          | 32.5 ± 26.25   | 52.05 ± 49.94          | 39.0 ± 21.75   |
| Nasal FeNO (ppb)                        | 430.64 ± 187.93        | 421.0 ± 207.0  | 437.55 ± 202.33        | 390 ± 131.0    | 482.59 ± 167.78        | 475.0 ± 283.25 |
| Nasal Eosinophil Count (%)              | 5.70 ± 14.43           | 1.16 ± 1.56    | 3.71 ± 4.77            | 1.53 ± 3.94    | 8.21 ± 10.84           | 3.21 ± 7.22    |
| Mucociliary Clearance Time (min)        | 12.43 ± 5.67           | 13.62 ± 6.81   | 11.20 ± 5.10           | 11.75 ± 7.19   | 11.66 ± 4.59           | 15.00 ± 7.07   |
| <b>Spirometry</b>                       |                        |                |                        |                |                        |                |
| FVC (%)                                 | 110.32 ± 16.08         | 109.0 ± 24.50  | 110.27 ± 13.32         | 113.0 ± 20.50  | 109.14 ± 13.86         | 113.5 ± 24.25  |
| FEV1 (%)                                | 103.73 ± 13.21         | 99.5 ± 18.50   | 104.27 ± 11.42         | 104.5 ± 19.50  | 102.91 ± 11.62         | 103.0 ± 18.75  |
| FEV1/FVC (%)                            | 97.73 ± 8.17           | 99.5 ± 9.75    | 98.55 ± 8.25           | 98.5 ± 10.25   | 98.55 ± 8.57           | 98.0 ± 12.25   |
| PEF (%)                                 | 98.95 ± 15.12          | 97.0 ± 24.75   | 105.86 ± 14.94         | 104.5 ± 25.50  | 103.64 ± 15.56         | 97.0 ± 25.25   |
| MEF 25%–75%                             | 87.18 ± 21.81          | 88.5 ± 35.00   | 87.68 ± 23.24          | 87.5 ± 35.00   | 86.27 ± 22.71          | 81.5 ± 36.25   |
| <b>Differential Blood Count</b>         |                        |                |                        |                |                        |                |
| WBC (10 <sup>9</sup> /μl)               | 5.48 ± 1.51            | 5.38 ± 2.15    | 6.10 ± 1.41            | 6.24 ± 1.70    | 5.63 ± 1.46            | 5.89 ± 1.66    |
| RBC (106/μl)                            | 4.97 ± 0.85            | 4.75 ± 0.49    | 4.75 ± 0.38            | 4.62 ± 0.45    | 4.73 ± 0.36            | 4.73 ± 0.42    |
| Blood Neutrophil Count (%)              | 55.55 ± 8.03           | 56.00 ± 10.38  | 56.71 ± 7.58           | 56.90 ± 9.50   | 56.53 ± 7.28           | 56.70 ± 11.02  |
| Blood Eosinophil Count (%)              | 3.37 ± 1.80            | 3.15 ± 2.40    | 3.38 ± 2.05            | 3.10 ± 2.90    | 3.85 ± 2.21            | 3.30 ± 2.67    |
| <b>Six Minute Walk Test</b>             |                        |                |                        |                |                        |                |
| 6MWT-Distance (%)                       | 103.36 ± 10.49         | 102.59 ± 15.75 | 108.79 ± 9.51          | 106.64 ± 14.41 | 107.60 ± 8.74          | 107.53 ± 12.96 |
| Peak Respiratory Frequency (1/min)      | 30.78 ± 4.08           | 31.10 ± 4.50   | 36.55 ± 8.11           | 34.10 ± 10.52  | 35.31 ± 7.09           | 35.70 ± 7.45   |
| Peak Minute Ventilation (L/min)         | 50.64 ± 16.06          | 47.35 ± 14.85  | 56.30 ± 16.02          | 55.80 ± 17.73  | 54.97 ± 17.82          | 55.05 ± 26.07  |
| BORG Scale Dyspnea Post-Test            | 1.73 ± 1.07            | 2.0 ± 1.00     | 1.95 ± 1.67            | 2.0 ± 2.38     | 1.55 ± 1.66            | 1.0 ± 1.50     |
| BORG Scale Fatigue Post-Test            | 1.61 ± 1.22            | 2.0 ± 1.38     | 2.07 ± 1.91            | 2.0 ± 2.38     | 1.93 ± 1.89            | 2.0 ± 1.38     |
| <b>RhinAsthma Questionnaire</b>         |                        |                |                        |                |                        |                |
| Total Score                             | 20.28 ± 14.04          | 19.25 ± 11.34  | 15.45 ± 13.55          | 11.89 ± 15.10  | 22.23 ± 18.46          | 13.94 ± 26.98  |
| Limitation in Daily Life                | 18.99 ± 18.74          | 11.11 ± 27.78  | 13.84 ± 16.83          | 7.78 ± 15.00   | 17.98 ± 18.21          | 8.89 ± 22.22   |
| Respiratory Problems                    | 17.91 ± 16.86          | 12.12 ± 16.67  | 13.50 ± 15.56          | 6.06 ± 18.18   | 17.36 ± 16.39          | 13.64 ± 22.73  |
| Rhinoconjunctivitis Score               | 20.78 ± 18.50          | 14.29 ± 27.38  | 21.43 ± 18.34          | 16.67 ± 27.38  | 30.74 ± 26.32          | 26.19 ± 32.14  |
| Treatment and Medication Problems       | 16.06 ± 18.01          | 6.67 ± 33.33   | 10.30 ± 16.93          | 0.00 ± 20.00   | 18.18 ± 22.18          | 10.00 ± 26.67  |
| Impairment in Sensory Perceptions       | 27.65 ± 19.65          | 25.00 ± 22.92  | 18.18 ± 17.75          | 16.67 ± 25.00  | 26.89 ± 27.21          | 16.67 ± 31.25  |
| <b>Questionnaires</b>                   |                        |                |                        |                |                        |                |
| Asthma Control Test                     | 22.86 ± 3.20           | 24.0 ± 2.75    | 23.68 ± 2.64           | 25.0 ± 1.75    | 23.32 ± 3.09           | 24.0 ± 2.00    |
| Visual Analogue Scale–General Health    | 80.77 ± 17.82          | 87.50 ± 15.25  | 79.27 ± 19.50          | 85.00 ± 15.75  | 76.59 ± 22.72          | 79.50 ± 26.00  |
| Visual Analogue Scale–Allergic Symptoms | 82.45 ± 13.47          | 85.0 ± 16.50   | 83.59 ± 11.90          | 82.5 ± 19.75   | 67.50 ± 25.95          | 74.0 ± 24.25   |

5

6
